# Supplementary material
Source: PubMed Central journal article supplement (PMC3436139)

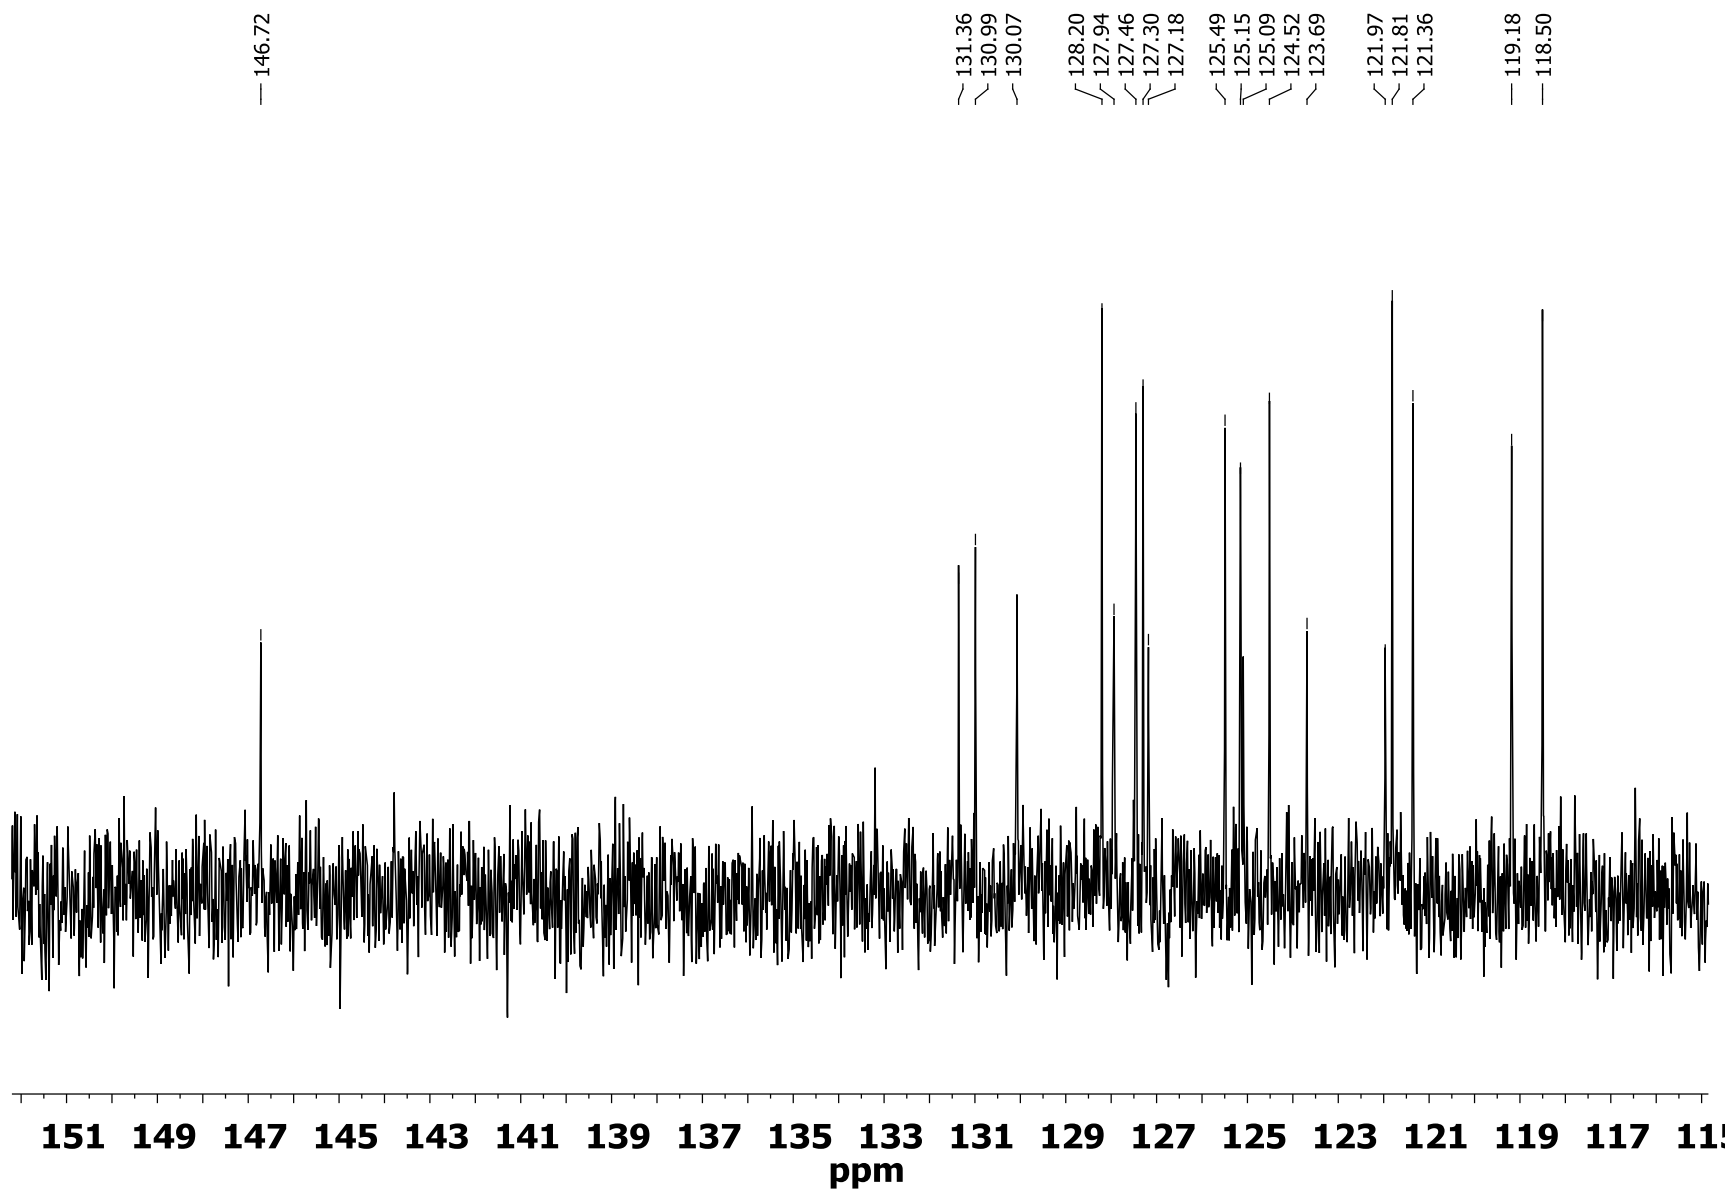

Figure S1.  $^{13}\text{C}$  NMR spectra of 8-hydroxy-B[a]P-7-O-sulfate (M1)

Supplement: supp_M112.386052_jbc.M112.386052-1.pdf [file supp_M112.386052_jbc.M112.386052-1.pdf]
